# Supplementary material for: Paradoxical sex-specific patterns of autoantibody response to SARS-CoV-2 infection
Source: Springer Nature journal article supplement (doi:10.1186/s12967-021-03184-8), 2021-12-01

**SUPPLEMENTAL MATERIAL**

***Paradoxical Sex-Specific Patterns of Autoantibody Response  
to SARS-CoV-2 Infection***

**Table S1.** Composition of the AABs array.

| No. | Protein Ref ID | Gene Symbol | Gene Name                                                  | Associated Traits                                         |
|-----|----------------|-------------|------------------------------------------------------------|-----------------------------------------------------------|
| 1   | 0105507583     | NCL         | Nucleolin (Protein C23)                                    | R1ab protein homologue                                    |
| 2   | 0104741802     | SRSF1       | Serine/arginine-rich splicing factor 1                     | N-protein homologue                                       |
| 3   | 0104741211     | RAE1        | Ribonucleic acid export 1                                  | ORF6 interaction partner                                  |
| 4   | 0104743520     | EIF4H       | Eukaryotic translation initiation factor 4H                | NSP9 interaction partner                                  |
| 5   | 0105483772     | MOV10       | Mov10 RISC complex RNA helicase                            | N protein interaction partner                             |
| 6   | 1043144426     | NUMA1       | Nuclear mitotic apparatus protein 1                        | pSS, CTD                                                  |
| 7   | 0105510253     | KDM6B       | Lysine demethylase 6B                                      | SLE, SSc                                                  |
| 8   | 0105482537     | ANXA2       | Annexin A2                                                 |                                                           |
| 9   | 0105488388     | TLE1        | Transducin-like enhancer of split 1                        | NSP13 interaction partner                                 |
| 10  | 1066861231     | SOX13       | Transcription factor SOX-13                                | PBC, type 1 diabetes                                      |
| 11  | 1066861238     | SLC30A8     | Solute carrier family 30 member 8                          | Type 1 diabetes                                           |
| 12  | 1066860558     | SERPINB4    | Serpin family B member 4                                   | Lung-specific protein                                     |
| 13  | 1066858160     | SERPINB3    | Serpin family B member 3                                   | Lung-specific protein                                     |
| 14  | 1066858257     | IL4         | Interleukin 4                                              | Lung fibrosis                                             |
| 15  | 1066558274     | SRP19       | Signal recognition particle 19kDa                          | NSP8 interaction partner                                  |
| 16  | 0104741509     | SET         | Protein SET (HLA-DR-associated protein II)                 | R1a-Protein homologue                                     |
| 17  | 0105481639     | GRP         | Gastrin releasing peptide                                  | Lung fibrosis                                             |
| 18  | 1105172472     | AK4         | Adenylate kinase 4, mitochondrial                          | Y14-Protein homologue                                     |
| 19  | 1066866713     | HNRNPA2B1   | Heterogeneous nuclear ribonucleoprotein A2/B1              | RA, SLE                                                   |
| 20  | 0104740269     | LARP1       | La ribonucleoprotein domain family, member 1               | N protein interaction partner                             |
| 21  | 1043139412     | S100A9      | S100 calcium binding protein A9                            |                                                           |
| 22  | 0104745439     | MIF         | Macrophage migration inhibitory factor                     |                                                           |
| 23  | 1047888619     | UBTF        | Upstream binding transcription factor, RNA polymerase I    | CTD, SSc, SLE, SjS                                        |
| 24  | 1066838756     | LTF         | Lactotransferrin                                           | Vasculitis                                                |
| 25  | 1066858459     | S100A8      | S100 calcium binding protein A8                            |                                                           |
| 26  | 1066527806     | PPL         | Periplakin                                                 | Antigen for autoimmunity in idiopathic pulmonary fibrosis |
| 27  | 1066559705     | IL17A       | Interleukin 17A                                            | SLE, lung fibrosis                                        |
| 28  | 1066858740     | IFNA4       | Interferon alpha 4                                         | SLE                                                       |
| 29  | 0105489152     | RNF41       | E3 ubiquitin-protein ligase NRDP1 (RING finger protein 41) | NSP15 interaction partner                                 |
| 30  | 0105489248     | VEGFA       | Vascular endothelial growth factor A                       |                                                           |

|    |            |          |                                                       |                                               |
|----|------------|----------|-------------------------------------------------------|-----------------------------------------------|
| 31 | 1066561916 | HIST1H4A | Histone cluster 1 H4 family member a                  | Drug-induced lupus (DIL)                      |
| 32 | 1066838464 | ECE1     | Endothelin converting enzyme 1                        | Biomarker pulmonary fibrosis                  |
| 33 | 1066859699 | ICA1     | Islet cell autoantigen 1                              | Type 1 diabetes                               |
| 34 | 0104744361 | CHGA     | Chromogranin A                                        |                                               |
| 35 | 0105483201 | NPM1     | Nucleophosmin                                         | SLE, SSc with pulmonary arterial hypertension |
| 36 | 1066562106 | CSF2     | Colony stimulating factor 2                           | SLE, lung fibrosis                            |
| 37 | 1066560001 | CXCL8    | C-X-C motif chemokine ligand 8                        |                                               |
| 38 | 1066859503 | ELANE    | Elastase, neutrophil expressed                        | Vasculitis                                    |
| 39 | 1043136644 | IL6      | Interleukin 6                                         | SLE                                           |
| 40 | 1043140678 | MX1      | Interferon-induced GTP-binding protein Mx1            | SLE, Chronic Pulmonary Diseases               |
| 41 | 1066562002 | IL10     | Interleukin 10                                        | SLE, lung fibrosis                            |
| 42 | 1066859715 | CTSG     | Cathepsin G                                           | Vasculitis                                    |
| 43 | 1043140754 | CHD3     | Chromodomain helicase DNA binding protein 3           | Myositis                                      |
| 44 | 1043144332 | AQP4     | Aquaporin 4                                           | NMO                                           |
| 45 | 1066859023 | LYZ      | Lysozyme                                              | Vasculitis                                    |
| 46 | 1066858547 | IFNA6    | Interferon alpha 6                                    | SLE                                           |
| 47 | 1166361472 | IGF1R    | Insulin like growth factor 1 receptor                 | Autoimmune thyroiditis                        |
| 48 | 1197785315 | VIM      | Vimentin                                              | SLE, RA, CTD                                  |
| 49 | 1197682501 | ROS1     | ROS proto-oncogene 1, receptor tyrosine kinase        | Lung-specific protein                         |
| 50 | 1208494664 | VEGFC    | Vascular endothelial growth factor C                  |                                               |
| 51 | 1208494784 | ENO1     | Enolase 1                                             | Vasculitis                                    |
| 52 | 0184571702 | SRP54    | Signal recognition particle 54                        | Myositis                                      |
| 53 | 0184571651 | DBT      | Dihydrolipoamide branched chain transacylase E2       | Primary Biliary Cirrhosis (PBC)               |
| 54 | 0184571673 | Chd4     | Chromodomain helicase DNA binding protein 4           | Myositis                                      |
| 55 | 0184649040 | DLAT     | Dihydrolipoamide S-acetyltransferase                  | Primary Biliary Cirrhosis (PBC)               |
| 56 | 0184571698 | MDA5     | Melanoma differentiation-associated protein 5         |                                               |
| 57 | 0184571630 | TRIM33   | Tripartite motif containing 33                        | Myositis                                      |
| 58 | 0184571670 | EXOSC10  | Exosome component 10                                  | Myositis/SSc                                  |
| 59 | 0184571689 | SNRPB    | Small nuclear ribonucleoprotein polypeptides B and B1 | SLE                                           |
| 60 | 0184571639 | SNRPC    | Small nuclear ribonucleoprotein polypeptide C         | SLE, CTD                                      |
| 61 | 0184571711 | SNRNP70  | Small nuclear ribonucleoprotein U1 subunit 70         | SLE, CTD                                      |
| 62 | 0184571645 | SSB      | Sjogren syndrome antigen B                            | SSB / pSS, SLE                                |
| 63 | 0184571685 | SmD3     | Small nuclear ribonucleoprotein D3                    |                                               |

|    |                 |        |                                                |                                       |
|----|-----------------|--------|------------------------------------------------|---------------------------------------|
| 64 | 0184571664      | SNRPA  | Small nuclear ribonucleoprotein polypeptide A  | SLE, CTD                              |
| 65 | 1058284508      | TOP1   | Topoisomerase (DNA) I                          | Diffuse SSc                           |
| 66 | 0184571620      | TROVE2 | TROVE domain family member 2                   | SSA / SLE, SSB, CTD                   |
| 67 | 0184571617      | SNRPD1 | Small nuclear ribonucleoprotein D1 polypeptide | SLE                                   |
| 68 | 0209387966      | IFNA2  | Interferon alpha-2                             | SLE/RA                                |
| 69 | 0184648993      | MPO    | Myeloperoxidase                                | Vasculitis                            |
| 70 | 0184649015      | Sp100  | SP100 nuclear antigen                          | Primary Biliary Cirrhosis (PBC)       |
| 71 | 0184649061      | PRTN3  | Proteinase 3                                   | Vasculitis                            |
| 72 | 1058284066      | CENPB  | Centromere protein B                           | Limited SSc                           |
| 73 | 0201790353      | TGFB1  | Transforming growth factor beta 1              |                                       |
| 74 | 0221992867      | IFNW1  | Interferon omega 1                             | SLE                                   |
| 75 | 0236191321      | TPO    | Thyroid peroxidase                             | Autoimmune thyroiditis                |
| 76 | 0348725826      | PTPRN  | Protein tyrosine phosphatase receptor type N   | Type 1 diabetes                       |
| 77 | 0348725809      | TSHR   | Thyroid stimulating hormone receptor           | Autoimmune thyroiditis                |
| 78 | 1086925499      | ACE2   | Angiotensin I converting enzyme 2              |                                       |
| 79 | 0184571695      | HARS   | Histidyl-tRNA synthetase                       | Anti-synthetase syndrome              |
| 80 | 0184649012      | APOH   | Apolipoprotein H                               | Anti-phospholipid syndrome (APS, SLE) |
| 81 | 0184570981      | RPLP2  | Ribosomal protein lateral stalk subunit P2     | SLE                                   |
| 82 | 0184571682      | TRIM21 | Tripartite motif containing 21                 | SSA / SLE, pSS, CTD                   |
| 83 | 0201790340      | SPP1   | Secreted phosphoprotein 1                      |                                       |
| 84 | 1049727854      | C3     | Complement C1q B chain                         | SLE                                   |
| 85 | 0348725837      | GAD65  | Glutamate decarboxylase 2                      |                                       |
| 86 | 0348725819      | TG     | Thyroglobulin                                  | Autoimmune thyroiditis                |
| 87 | 0365576846      | INS    | Insulin                                        | Type 1 diabetes                       |
| 88 | 0174988610      | CTLA4  | Cytotoxic T-lymphocyte associated protein 4    |                                       |
| 89 | 0184649087      | DLST   | Dhydrolipoamide S-succinyltransferase          | Primary Biliary Cirrhosis (PBC)       |
| 90 | 0105482432      | NCOA6  | Nuclear receptor coactivator 6                 |                                       |
| 91 | 0349974412      | CADM3  | Cell adhesion molecule 3                       | Membranous lupus nephritis            |
| 91 | Control_BSA     |        | Control_BSA                                    |                                       |
| 92 | Control_Ecoli   |        | Control_Ecoli                                  |                                       |
| 93 | Control_hulgGhi |        | Control_hulgGhi                                |                                       |
| 94 | Control_hulgGlo |        | Control_hulgGlo                                |                                       |
| 95 | Control_hulgM   |        | Control_hulgM                                  |                                       |
| 96 | Control_hulgA   |        | Control_hulgA                                  |                                       |

**Table S2.** Demographic and clinical characteristics of 177 HCWs

|                                       | <b>Overall<br/>(N=177)</b> | <b>Women<br/>(N=115)</b> | <b>Men<br/>(N=62)</b> | <b>P value</b> |
|---------------------------------------|----------------------------|--------------------------|-----------------------|----------------|
| <b>Age (median [IQR])</b>             | 35.00 [30.00, 44.00]       | 35.00 [30.00, 46.50]     | 34.50 [29.25, 40.75]  | 0.529          |
| <b>Race/Ethnicity (%)</b>             |                            |                          |                       |                |
| Hispanic/Latinx                       | 50 (28.2)                  | 34 (29.6)                | 16 (25.8)             | 0.531          |
| Non-Hispanic Asian                    | 46 (26.0)                  | 30 (26.1)                | 16 (25.8)             |                |
| Non-Hispanic Black                    | 15 (8.5)                   | 11 (9.6)                 | 4 (6.5)               |                |
| Non-Hispanic White                    | 56 (31.6)                  | 32 (27.8)                | 24 (38.7)             |                |
| Other                                 | 10 (5.6)                   | 8 (7.0)                  | 2 (3.2)               |                |
| <b>Medical Conditions</b>             |                            |                          |                       |                |
| Cancer                                | 2 (1.2)                    | 2 (1.8)                  | 0 (0.0)               | 0.797          |
| Cardiovascular                        | 2 (1.2)                    | 1 (0.9)                  | 1 (1.7)               | 1.000          |
| Chronic Obstructive Pulmonary Disease | 0 (0)                      | 0 (0)                    | 0 (0)                 | NA             |
| Diabetes Mellitus                     | 5 (2.9)                    | 3 (2.7)                  | 2 (3.3)               | 1.000          |
| Hypertension                          | 19 (11.0)                  | 13 (11.4)                | 6 (10.2)              | 1.000          |
| Immune                                | 3 (1.7)                    | 3 (2.7)                  | 0 (0.0)               | 0.504          |
| Prior diagnosis of COVID-19           | 68 (38.4)                  | 42 (36.5)                | 26 (41.9)             | 0.586          |
| Smoking                               | 2 (1.1)                    | 1 (0.9)                  | 1 (1.6)               | 1.000          |
| Vaping                                | 14 (7.9)                   | 6 (5.2)                  | 8 (12.9)              | 0.130          |
| <b>Reported symptoms</b>              |                            |                          |                       |                |
| Chest pain                            | 36 (20.3)                  | 24 (20.9)                | 12 (19.4)             | 0.966          |
| Chills                                | 86 (48.6)                  | 52 (45.2)                | 34 (54.8)             | 0.287          |
| Conjunctivitis                        | 11 (6.2)                   | 5 (4.3)                  | 6 (9.7)               | 0.282          |
| Dry cough                             | 100 (56.5)                 | 64 (55.7)                | 36 (58.1)             | 0.881          |
| Productive cough                      | 44 (24.9)                  | 32 (27.8)                | 12 (19.4)             | 0.288          |
| Diarrhea                              | 53 (29.9)                  | 31 (27.0)                | 22 (35.5)             | 0.313          |
| Fatigue                               | 117 (66.1)                 | 76 (66.1)                | 41 (66.1)             | 1.000          |
| Fever                                 | 78 (44.1)                  | 47 (40.9)                | 31 (50.0)             | 0.313          |
| Headache                              | 110 (62.1)                 | 73 (63.5)                | 37 (59.7)             | 0.738          |
| Loss of appetite                      | 68 (38.4)                  | 49 (42.6)                | 19 (30.6)             | 0.162          |
| Muscle aches                          | 101 (57.1)                 | 66 (57.4)                | 35 (56.5)             | 1.000          |
| Nasal congestion                      | 93 (52.5)                  | 60 (52.2)                | 33 (53.2)             | 1.000          |
| Nausea                                | 47 (26.6)                  | 37 (32.2)                | 10 (16.1)             | 0.033          |
| Runny nose                            | 76 (42.9)                  | 55 (47.8)                | 21 (33.9)             | 0.103          |
| Shortness of breath                   | 57 (32.2)                  | 33 (28.7)                | 24 (38.7)             | 0.233          |
| Skin changes                          | 13 (7.3)                   | 9 (7.8)                  | 4 (6.5)               | 0.974          |
| Smell and/or taste                    | 92 (52.0)                  | 61 (53.0)                | 31 (50.0)             | 0.819          |
| Sneezing                              | 83 (46.9)                  | 56 (48.7)                | 27 (43.5)             | 0.619          |
| Sore throat                           | 71 (40.1)                  | 48 (41.7)                | 23 (37.1)             | 0.660          |
| Vomiting                              | 16 (9.0)                   | 9 (7.8)                  | 7 (11.3)              | 0.623          |
| <b>Symptom severity</b>               |                            |                          |                       | 0.982          |
| Asymptomatic                          | 23 (13.0)                  | 15 (13%)                 | 8 (12.9%)             |                |
| Mild symptom burden                   | 64 (36.2)                  | 41 (35.7%)               | 23 (37.1%)            |                |
| More than mild symptom burden         | 90 (50.8)                  | 59 (51.3%)               | 31 (50%)              |                |

**Table S3.** Sex-specific clustering of autoantibody responses, by sex and symptom burden

**Men, Asymptomatic**

| Cluster | AAB                                                                                                                                                                       |
|---------|---------------------------------------------------------------------------------------------------------------------------------------------------------------------------|
| 1       | MOV10 IL4 SET S100A9 IFNA4 NPM1 CSF2 LYZ IFNA6 IGF1R ROS1 DLAT SNRNP70 TROVE2 IFNA2 PRTN3 IFNW1 ACE2 HARS RPLP2 SPP1 C3 TG CTLA4 DLST NCOA6                               |
| 2       | SOX13 MPO TPO TSHR APOH                                                                                                                                                   |
| 3       | KDM6B LARP1 PPL AQP4 VEGFC SRP54 DBT SNRPB SNRPC SNRPA SNRPD1 GAD65                                                                                                       |
| 4       | SRSF1 RAE1 NUMA1 SERPINB4 GRP HNRNPA2B1 S100A8 ICA1 CHGA IL6 MX1 CHD3 MDA5 TRIM33 SSB TGFB1 TRIM21 INS                                                                    |
| 5       | NCL EIF4H ANXA2 TLE1 SLC30A8 SERPINB3 SRP19 AK4 MIF UBTF LTF IL17A RNF41 VEGFA HIST1H4A ECE1 CXCL8 ELANE IL10 CTSG VIM ENO1 CHD4 EXOSC10 SMD3 TOP1 SP100 CENPB PTRN CADM3 |

**Women, Asymptomatic**

| Cluster | AAB                                                                                                                                                                           |
|---------|-------------------------------------------------------------------------------------------------------------------------------------------------------------------------------|
| 1       | IL4 S100A9 IFNA4 NPM1 IL10 LYZ IGF1R DLAT SNRNP70 TROVE2 PRTN3 IFNW1 HARS RPLP2 SPP1 C3 TG CTLA4 DLST                                                                         |
| 2       | SOX13 GRP HNRNPA2B1 LARP1 S100A8 PPL IL6 CHD3 SRP54 DBT SNRPB SNRPC SSB SNRPA SNRPD1 TPO TSHR GAD65                                                                           |
| 3       | MOV10 ANXA2 TLE1 SET LTF IL17A RNF41 VEGFA ECE1 CSF2 CTSG IFNA6 VIM ROS1 TRIM33 IFNA2 MPO SP100 CENPB PTRN ACE2 APOH NCOA6 CADM3                                              |
| 4       | NCL SRSF1 RAE1 EIF4H NUMA1 KDM6B SLC30A8 SERPINB4 SERPINB3 SRP19 AK4 MIF UBTF HIST1H4A ICA1 CHGA CXCL8 ELANE MX1 AQP4 VEGFC ENO1 CHD4 MDA5 EXOSC10 SMD3 TOP1 TGFB1 TRIM21 INS |

**Men, After Mild Symptoms**

| Cluster | AAB                                                                                                                    |
|---------|------------------------------------------------------------------------------------------------------------------------|
| 1       | TPO                                                                                                                    |
| 2       | SRSF1 KDM6B GRP HNRNPA2B1 LARP1 S100A8 MDA5 SNRPD1                                                                     |
| 3       | VIM ROS1 VEGFC ENO1                                                                                                    |
| 4       | MPO APOH NCOA6                                                                                                         |
| 5       | NCL RAE1 EIF4H SERPINB4 SERPINB3 SRP19 AK4 MIF UBTF ICA1 CXCL8 ELANE MX1 CHD4 TRIM33 EXOSC10 SMD3 TOP1 SP100 TGFB1 INS |
| 6       | MOV10 NUMA1 SLC30A8 LTF CHGA PTRN CADM3                                                                                |
| 7       | IL4 S100A9 IFNA4 IL10 LYZ IGF1R DLAT SNRNP70 TROVE2 PRTN3 IFNW1 HARS RPLP2 SPP1 C3 TG DLST                             |
| 8       | PPL IL6 DBT SNRPB SNRPC TSHR GAD65                                                                                     |
| 9       | SOX13 CHD3 AQP4 SRP54 SSB SNRPA TRIM21                                                                                 |
| 10      | ANXA2 TLE1 SET IL17A RNF41 VEGFA HIST1H4A ECE1 NPM1 CSF2 CTSG IFNA6 IFNA2 CENPB ACE2 CTLA4                             |

**Women, After Mild Symptoms**

| Cluster | AAB                                                                                                                                                                                                                           |
|---------|-------------------------------------------------------------------------------------------------------------------------------------------------------------------------------------------------------------------------------|
| 1       | KDM6B SOX13 GRP LARP1 PPL CHD3 SRP54 DBT SNRPB SNRPC SSB SNRPA SNRPD1 TPO TSHR GAD65                                                                                                                                          |
| 2       | MOV10 ANXA2 IL4 SET S100A9 LTF IL17A IFNA4 RNF41 ECE1 NPM1 CSF2 IL10 CTSG LYZ IFNA6 IGF1R VIM ROS1 DLAT SNRNP70 TROVE2 IFNA2 PRTN3 CENPB IFNW1 PTRN ACE2 HARS RPLP2 SPP1 C3 TG CTLA4 DLST NCOA6 CADM3                         |
| 3       | NCL SRSF1 RAE1 EIF4H NUMA1 TLE1 SLC30A8 SERPINB4 SERPINB3 SRP19 AK4 HNRNPA2B1 MIF UBTF S100A8 VEGFA HIST1H4A ICA1 CHGA CXCL8 ELANE IL6 MX1 AQP4 VEGFC ENO1 CHD4 MDA5 TRIM33 EXOSC10 SMD3 TOP1 MPO SP100 TGFB1 APOH TRIM21 INS |

**Men, After More than Mild Symptoms**

| Cluster | AAB                                                                                                                                |
|---------|------------------------------------------------------------------------------------------------------------------------------------|
| 1       | MOV10 CHGA                                                                                                                         |
| 2       | SET NPM1 DLAT SNRNP70 IFNA2 PTRN HARS RPLP2 CTLA4 NCOA6                                                                            |
| 3       | SRSF1 RAE1 KDM6B SERPINB4 SERPINB3 HNRNPA2B1 ICA1 IL6 TRIM21                                                                       |
| 4       | NCL AK4 MIF UBTF CXCL8 ELANE MX1 CHD4 EXOSC10 SMD3 TOP1 INS EIF4H RNF41 VEGFA HIST1H4A ECE1 VIM ROS1 ENO1 TRIM33 SP100 CENPB TGFB1 |
| 5       | S100A9 IFNA4 LYZ IGF1R TROVE2 PRTN3 IFNW1 SPP1 C3 TG DLST                                                                          |
| 6       | GRP S100A8 CHD3 AQP4 MDA5                                                                                                          |
| 7       | TPO TSHR                                                                                                                           |
| 8       | ANXA2 TLE1 LTF IL17A                                                                                                               |
| 9       | NUMA1 SLC30A8 SRP19 LARP1                                                                                                          |
| 10      | SNRPB SNRPC SNRPA SNRPD1                                                                                                           |
| 11      | IL4 CSF2 IL10 CTSG IFNA6 ACE2 CADM3                                                                                                |
| 12      | SOX13 PPL SRP54 DBT SSB GAD65                                                                                                      |
| 13      | MPO APOH                                                                                                                           |
| 14      | VEGFC                                                                                                                              |

**Women, After More than Mild Symptoms**

| Cluster | AAB                                                                                        |
|---------|--------------------------------------------------------------------------------------------|
| 1       | MOV10 IL4 CSF2 CTSG IFNA6 ACE2                                                             |
| 2       | SRSF1 KDM6B SERPINB4 GRP SNRPC                                                             |
| 3       | ANXA2 TLE1 LTF IL17A RNF41 VEGFA TRIM33 SP100 CENPB PTRN                                   |
| 4       | SET S100A9 IFNA4 NPM1 IL10 LYZ IGF1R IFNW1 HARS RPLP2 CTLA4                                |
| 5       | VIM ROS1 VEGFC ENO1                                                                        |
| 6       | EIF4H NUMA1 INS                                                                            |
| 7       | SLC30A8 CHGA AQP4                                                                          |
| 8       | SRP54 DBT SSB SNRPA GAD65                                                                  |
| 9       | LARP1 PPL SNRPB SNRPD1                                                                     |
| 10      | MPO APOH                                                                                   |
| 11      | TSHR                                                                                       |
| 12      | NCL RAE1 SERPINB3 SRP19 AK4 MIF UBTF HIST1H4A CXCL8 ELANE MX1 CHD4 EXOSC10 SMD3 TOP1 TGFB1 |
| 13      | SOX13                                                                                      |
| 14      | HNRNPA2B1 MDA5                                                                             |
| 15      | TPO                                                                                        |
| 16      | NCOA6                                                                                      |
| 17      | CHD3                                                                                       |
| 18      | ECE1 DLAT SNRNP70 IFNA2 CADM3                                                              |
| 19      | TROVE2 PRTN3 SPP1 C3 TG DLST                                                               |
| 20      | S100A8                                                                                     |
| 21      | ICA1 IL6 TRIM21                                                                            |

**Table S4.** Associations of autoantibody reactivity with symptoms in men. Beta coefficients from age-adjusted regression analysis comparing males with a specific symptom burden to males without the same symptom are shown. The last 3 columns display results from age-adjusted analyses comparing males with different levels of symptoms burden to the pre-pandemic healthy control group.

| Beta     | Chest pain | Chills | Conjunctivitis | Cough productive | Diarrhea | Fatigue | Fever  | Headache | Loss of appetite | Muscle aches | Nasal congestion | Nausea | Runny nose | Shortness of breath | Skin   | Smell taste | Sneezing | Sore throat | Asymptomatic | Mild   | More than mild |
|----------|------------|--------|----------------|------------------|----------|---------|--------|----------|------------------|--------------|------------------|--------|------------|---------------------|--------|-------------|----------|-------------|--------------|--------|----------------|
| ACE2     | 0.467      | 0.202  | 0.164          | 0.602            | 0.461    | 0.232   | 0.091  | 0.161    | 0.258            | 0.486        | 0.738            | 0.015  | 0.634      | 0.536               | -0.261 | 0.541       | 0.445    | 0.338       | -0.428       | 0.362  | 0.470          |
| AK4      | 0.117      | 0.133  | -0.527         | 0.634            | 0.293    | 0.337   | -0.016 | 0.187    | 0.224            | 0.201        | 0.411            | 0.132  | 0.207      | 0.183               | -0.109 | 0.198       | 0.206    | 0.235       | -0.372       | -0.008 | 0.128          |
| ANXA2    | -0.168     | -0.280 | -0.101         | 0.604            | 0.250    | 0.126   | -0.084 | -0.114   | 0.390            | -0.098       | 0.461            | 0.180  | 0.259      | 0.298               | -0.256 | 0.403       | 0.325    | 0.203       | 0.138        | 0.385  | 0.431          |
| APOH     | 0.483      | 0.095  | 0.528          | 0.579            | 0.153    | -0.079  | -0.014 | -0.063   | 0.220            | 0.186        | 0.059            | 0.693  | 0.147      | 0.156               | -0.002 | -0.525      | 0.257    | 0.549       | 0.716        | 0.287  | 0.509          |
| AQP4     | -0.483     | -0.382 | -0.121         | -0.448           | -0.128   | -0.425  | -0.281 | -0.419   | -0.339           | -0.189       | -0.125           | -0.725 | -0.113     | -0.626              | -0.589 | -0.468      | -0.065   | -0.405      | 0.509        | 0.590  | -0.078         |
| C3       | 0.094      | 0.119  | 0.503          | 0.505            | 0.420    | 0.386   | -0.107 | -0.021   | 0.427            | 0.125        | 0.490            | -0.444 | 0.361      | 0.367               | -0.218 | 0.640       | 0.292    | -0.002      | -0.195       | 0.509  | 0.472          |
| CADM3    | -0.090     | -0.168 | -0.207         | 0.375            | -0.300   | -0.156  | -0.046 | -0.737   | -0.144           | 0.160        | 0.334            | -0.236 | 0.507      | 0.084               | -0.276 | 0.090       | 0.179    | 0.008       | 0.596        | 0.709  | 0.622          |
| CHD4     | 0.137      | 0.032  | -0.221         | 0.882            | 0.228    | 0.147   | -0.090 | -0.127   | 0.370            | 0.003        | 0.627            | 0.009  | 0.452      | 0.109               | -0.414 | 0.285       | 0.573    | 0.508       | -0.228       | 0.406  | 0.415          |
| CHGA     | 0.605      | 0.364  | 0.227          | 0.642            | 0.327    | 0.094   | 0.135  | 0.045    | 0.256            | 0.170        | 0.042            | 0.446  | -0.132     | 0.584               | 0.453  | 0.163       | 0.276    | 0.578       | -0.295       | -0.422 | 0.085          |
| CSF2     | 0.476      | 0.136  | -0.155         | 0.654            | 0.591    | 0.176   | 0.047  | 0.245    | 0.198            | 0.471        | 0.518            | 0.342  | 0.430      | 0.365               | -0.374 | 0.391       | 0.317    | 0.324       | -0.652       | 0.212  | 0.338          |
| CTLA4    | -0.275     | -0.174 | 0.257          | 0.428            | 0.198    | 0.215   | -0.153 | -0.231   | 0.195            | 0.017        | 0.682            | -0.370 | 0.563      | 0.448               | -0.244 | 0.710       | 0.420    | -0.083      | -0.148       | 0.688  | 0.473          |
| CTSG     | 0.214      | -0.043 | -0.307         | 0.694            | 0.326    | 0.101   | -0.056 | 0.085    | 0.159            | 0.289        | 0.723            | 0.102  | 0.684      | 0.322               | -0.114 | 0.432       | 0.457    | 0.236       | -0.248       | 0.307  | 0.496          |
| CXCL8    | 0.287      | 0.100  | -0.682         | 0.866            | 0.208    | 0.118   | -0.094 | 0.110    | 0.254            | 0.377        | 0.589            | 0.204  | 0.522      | 0.311               | -0.370 | 0.313       | 0.424    | 0.605       | -0.429       | -0.030 | 0.268          |
| DBT      | 0.047      | -0.285 | -0.215         | 0.144            | -0.245   | -0.289  | -0.157 | -0.326   | 0.003            | -0.391       | 0.262            | 0.253  | 0.570      | -0.280              | 0.781  | -0.314      | 0.125    | -0.279      | 0.293        | 0.386  | -0.100         |
| DLAT     | 0.063      | -0.107 | 0.174          | 0.190            | 0.290    | 0.094   | -0.206 | -0.114   | 0.002            | 0.108        | 0.262            | -0.291 | 0.219      | 0.001               | 0.435  | 0.439       | 0.219    | -0.054      | 0.295        | 0.286  | 0.405          |
| ECE1     | 0.424      | 0.096  | 0.107          | 1.132            | 0.327    | 0.397   | 0.153  | 0.065    | 0.513            | 0.059        | 0.631            | 0.100  | 0.507      | 0.457               | 0.678  | 0.223       | 0.579    | 0.247       | -0.610       | -0.092 | -0.078         |
| EIF4H    | 0.069      | 0.067  | -0.150         | 0.612            | 0.187    | 0.099   | 0.077  | 0.117    | 0.307            | -0.156       | 0.421            | -0.032 | 0.384      | 0.383               | 0.087  | 0.174       | 0.424    | 0.006       | -0.142       | 0.492  | 0.434          |
| ELANE    | -0.177     | -0.190 | -0.473         | 0.319            | 0.115    | 0.258   | -0.002 | 0.117    | -0.162           | 0.273        | 0.606            | -0.196 | 0.568      | 0.233               | 0.525  | 0.596       | 0.381    | 0.039       | -0.061       | 0.325  | 0.645          |
| EXOSC10  | 0.059      | 0.261  | 0.506          | 0.785            | -0.111   | 0.176   | -0.115 | 0.027    | 0.074            | 0.166        | 0.153            | 0.041  | 0.156      | 0.147               | -0.349 | 0.367       | 0.244    | 0.324       | -0.242       | 0.468  | 0.301          |
| GRP      | 0.438      | 0.342  | 0.030          | 1.030            | 0.347    | 0.216   | 0.211  | 0.380    | 0.360            | 0.208        | 0.228            | 0.702  | 0.222      | 0.203               | 0.285  | 0.093       | 0.329    | 0.483       | -0.532       | 0.156  | -0.012         |
| HARS     | -0.059     | 0.149  | 0.350          | 0.620            | 0.273    | 0.393   | -0.071 | -0.074   | 0.260            | 0.155        | 0.500            | -0.363 | 0.305      | 0.287               | -0.247 | 0.497       | 0.326    | 0.178       | -0.035       | 0.572  | 0.563          |
| HIST1H4A | 0.098      | 0.226  | -0.329         | 0.874            | 0.167    | 0.288   | -0.133 | 0.021    | 0.098            | 0.297        | 0.550            | 0.176  | 0.580      | 0.291               | -0.379 | 0.312       | 0.316    | 0.479       | -0.256       | 0.111  | 0.220          |
| ICA1     | 0.006      | -0.035 | -0.713         | 0.863            | 0.182    | 0.297   | 0.018  | 0.229    | 0.130            | 0.200        | 0.387            | 0.363  | 0.017      | 0.406               | -0.050 | 0.288       | 0.340    | 0.365       | -0.161       | 0.037  | 0.455          |
| IFNA4    | -0.064     | -0.035 | 0.465          | 0.476            | 0.282    | 0.381   | 0.007  | -0.036   | 0.324            | 0.156        | 0.649            | -0.321 | 0.597      | 0.285               | 0.316  | 0.624       | 0.464    | -0.033      | -0.300       | 0.533  | 0.481          |
| IFNA6    | 0.274      | 0.144  | 0.375          | 0.650            | 0.211    | 0.336   | -0.124 | 0.050    | 0.215            | 0.360        | 0.651            | -0.002 | 0.723      | 0.328               | -0.077 | 0.535       | 0.429    | 0.268       | -0.633       | 0.120  | 0.178          |
| IGF1R    | -0.051     | -0.094 | 0.285          | 0.294            | 0.449    | 0.212   | -0.016 | -0.029   | 0.206            | 0.225        | 0.517            | -0.423 | 0.340      | 0.255               | -0.292 | 0.649       | 0.188    | -0.121      | -0.269       | 0.449  | 0.403          |
| IL17A    | 0.207      | -0.128 | -0.369         | 0.761            | 0.490    | 0.078   | 0.087  | 0.039    | 0.539            | 0.039        | 0.449            | 0.709  | 0.046      | 0.453               | -0.249 | 0.077       | 0.378    | 0.262       | 0.043        | -0.215 | 0.118          |
| IL4      | 0.244      | -0.077 | -0.101         | 0.557            | 0.528    | -0.075  | -0.012 | -0.317   | 0.460            | 0.261        | 0.659            | 0.048  | 0.532      | 0.294               | -0.337 | 0.202       | 0.686    | 0.082       | -0.233       | 0.263  | 0.380          |
| IL6      | 0.251      | -0.105 | -0.038         | 0.573            | -0.103   | -0.200  | 0.079  | -0.622   | 0.052            | -0.338       | 0.455            | 0.318  | 0.256      | 0.223               | -0.259 | 0.121       | 0.401    | 0.134       | 0.242        | 0.753  | 0.316          |
| INS      | -0.377     | -0.319 | -0.303         | 0.855            | -0.308   | -0.068  | -0.292 | -0.361   | 0.111            | -0.210       | 0.246            | -0.089 | 0.310      | 0.023               | -0.165 | -0.025      | 0.292    | -0.126      | 0.582        | 0.800  | 0.434          |
| LYZ      | 0.126      | 0.055  | 0.420          | 0.634            | 0.348    | 0.270   | -0.017 | 0.079    | 0.229            | 0.345        | 0.823            | -0.076 | 0.773      | 0.419               | -0.020 | 0.554       | 0.573    | 0.173       | -0.429       | 0.326  | 0.478          |
| MDA5     | 0.233      | 0.005  | -0.123         | 1.281            | 0.256    | 0.084   | -0.190 | 0.070    | 0.298            | 0.020        | 0.578            | 0.479  | 0.437      | 0.232               | 0.431  | 0.319       | 0.412    | 0.676       | -0.138       | 0.534  | 0.550          |
| MIF      | 0.012      | 0.193  | -0.210         | 0.957            | 0.103    | 0.256   | 0.008  | -0.121   | 0.192            | 0.233        | 0.473            | 0.421  | 0.499      | 0.249               | -0.066 | 0.252       | 0.476    | 0.690       | 0.271        | 0.682  | 0.826          |
| MOV10    | 0.197      | 0.058  | 0.950          | 0.737            | 0.738    | 0.331   | 0.268  | 0.033    | 0.671            | 0.388        | 0.734            | 0.583  | 0.428      | 0.390               | 0.717  | 0.298       | 0.552    | 0.620       | -0.338       | 0.497  | 0.678          |
| MX1      | 0.096      | 0.003  | -0.567         | 1.019            | -0.109   | -0.089  | -0.036 | -0.484   | -0.010           | 0.005        | 0.615            | -0.044 | 0.569      | 0.296               | -0.452 | 0.406       | 0.449    | 0.214       | 0.299        | 0.648  | 0.678          |
| NCL      | 0.057      | 0.204  | -0.564         | 0.884            | 0.273    | 0.354   | 0.199  | 0.049    | 0.433            | 0.248        | 0.569            | 0.375  | 0.218      | 0.477               | -0.445 | 0.278       | 0.277    | 0.561       | -0.105       | 0.407  | 0.700          |
| NPM1     | -0.148     | -0.256 | 0.074          | 0.750            | 0.099    | 0.265   | -0.205 | -0.238   | 0.174            | 0.129        | 0.407            | -0.250 | 0.449      | 0.152               | 0.195  | 0.554       | 0.354    | 0.025       | 0.029        | 0.648  | 0.495          |
| PRTN3    | -0.084     | -0.125 | 0.152          | 0.357            | 0.022    | 0.062   | -0.054 | -0.345   | -0.045           | 0.167        | 0.493            | 0.092  | 0.432      | 0.222               | -0.044 | 0.104       | 0.499    | 0.081       | -0.198       | 0.320  | 0.263          |
| RAE1     | -0.226     | -0.569 | -0.854         | 0.209            | 0.352    | -0.317  | -0.250 | -0.180   | 0.355            | -0.187       | 0.403            | 0.354  | 0.446      | -0.065              | 0.222  | -0.167      | 0.363    | -0.101      | 0.570        | 0.389  | 0.370          |
| RNF41    | 0.017      | 0.063  | -0.141         | 0.638            | 0.118    | 0.002   | -0.011 | -0.210   | 0.184            | 0.033        | 0.533            | -0.079 | 0.545      | 0.304               | -0.451 | 0.480       | 0.422    | 0.106       | 0.236        | 0.605  | 0.636          |
| RPLP2    | 0.020      | 0.045  | 0.324          | 0.492            | 0.274    | 0.231   | -0.037 | -0.175   | 0.353            | 0.187        | 0.554            | -0.052 | 0.523      | 0.413               | -0.072 | 0.528       | 0.460    | 0.071       | 0.045        | 0.310  | 0.475          |
| S100A9   | -0.254     | 0.066  | 0.844          | 0.398            | 0.315    | 0.163   | -0.027 | -0.228   | 0.343            | -0.005       | 0.560            | -0.240 | 0.594      | 0.284               | -0.308 | 0.581       | 0.474    | -0.107      | -0.064       | 0.607  | 0.491          |
| SET      | 0.039      | -0.140 | 0.480          | 0.380            | 0.053    | 0.186   | -0.359 | -0.327   | 0.169            | -0.196       | 0.319            | -0.309 | 0.436      | 0.153               | -0.324 | 0.574       | 0.315    | 0.194       | 0.000        | 0.661  | 0.353          |
| SLC30A8  | -0.415     | -0.038 | 0.434          | -0.175           | -0.016   | 0.400   | 0.140  | 0.112    | 0.113            | 0.340        | 0.661            | -0.360 | 0.597      | 0.416               | 0.230  | 0.341       | 0.609    | 0.014       | -0.073       | 0.369  | 0.434          |
| SNRNP70  | 0.429      | 0.108  | -0.260         | 1.066            | 0.556    | 0.069   | -0.143 | -0.053   | 0.424            | 0.222        | 0.414            | 0.005  | 0.502      | 0.511               | -0.436 | 0.568       | 0.363    | 0.260       | -0.189       | 0.140  | 0.487          |
| SNRPA    | 0.564      | 0.025  | -0.225         | 0.786            | 0.112    | -0.397  | 0.039  | -0.120   | 0.214            | 0.069        | 0.169            | 0.234  | 0.408      | -0.181              | 0.040  | -0.098      | 0.145    | 0.118       | 0.239        | -0.188 | -0.284         |
| SNRPB    | 0.834      | 0.549  | -0.389         | 1.357            | 0.171    | 0.325   | -0.052 | 0.379    | 0.546            | 0.466        | 0.403            | 0.654  | 0.537      | 0.461               | -0.725 | 0.538       | 0.424    | 0.733       | -0.344       | 0.039  | 0.544          |
| SNRPD1   | -0.203     | -0.019 | -0.332         | 0.212            | -0.270   | -0.021  | -0.525 | 0.085    | -0.054           | -0.333       | 0.168            | 0.051  | 0.415      | 0.061               | -0.225 | 0.119       | 0.323    | 0.532       | 0.558        | 0.410  | 0.747          |
| SOX13    | 0.255      | 0.108  | -0.321         | 0.154            | 0.509    | 0.065   | 0.106  | -0.056   | 0.182            | -0.126       | 0.711            | 0.244  | 0.441      | 0.174               | 0.341  | 0.148       | 0.790    | 0.265       | -0.057       | 0.172  | 0.698          |
| SRP19    | 0.248      | 0.237  | 0.742          | 0.787            | 0.344    | 0.516   | 0.003  | 0.285    | 0.429            | 0.445        | 0.562            | 0.243  | 0.512      | 0.357               | 0.165  | 0.302       | 0.362    | 0.329       | -0.145       | 0.281  | 0.593          |
| SSB      | 0.247      | 0.007  | -0.054         | 0.511            | -0.151   | -0.047  | -0.374 | 0.010    | 0.013            | 0.098        | 0.043            | 0.117  | 0.125      | -0.038              | -0.275 | 0.097       | 0.312    | 0.583       | 0.073        | 0.474  | 0.601          |
| TG       | -0.112     | 0.141  | 0.527          | 0.353            | 0.343    | 0.391   | 0.005  | -0.121   | 0.364            | 0.078        | 0.378            | -0.496 | 0.242      | 0.249               | -0.203 | 0.567       | 0.155    | -0.113      | -0.163       | 0.685  | 0.481          |
| TGFB1    | 0.288      | -0.365 | -0.157         | 0.499            | -0.087   | -0.231  | -0.403 | -0.280   | 0.135            | -0.222       | 0.041            | -0.060 | -0.102     | 0.247               | -1.042 | -0.160      | 0.189    | 0.092       | 0.812        | 0.867  | 0.520          |
| TOP1     | -0.008     | 0.382  | -0.635         | 0.816            | 0.008    | 0.436   | -0.013 | 0.024    | 0.125            | 0.407        | 0.289            | 0.151  | 0.178      | 0.197               | -0.441 | 0.256       | 0.176    | 0.808       | 0.081        | 0.551  | 0.865          |
| TRIM21   | -          |        |                |                  |          |         |        |          |                  |              |                  |        |            |                     |        |             |          |             |              |        |                |

**Table S5.** Associations of autoantibody reactivity with symptoms in men. P values from age-adjusted regression analysis comparing males with a specific symptom burden to males without the same symptom are shown. The last 3 columns display results from age-adjusted analyses comparing males with different levels of symptoms burden to the pre-pandemic healthy control group.

| P value  | Chest pain | Chills | Conjunctivitis | Cough productive | Diarrhea | Fatigue | Fever | Headache | Loss of appetite | Muscle aches | Nasal congestion | Nausea | Runny nose | Shortness of breath | Skin  | Smell taste | Sneezing | Sore throat | Asymptomatic | Mild  | More than mild |
|----------|------------|--------|----------------|------------------|----------|---------|-------|----------|------------------|--------------|------------------|--------|------------|---------------------|-------|-------------|----------|-------------|--------------|-------|----------------|
| ACE2     | 0.154      | 0.462  | 0.719          | 0.068            | 0.088    | 0.399   | 0.737 | 0.559    | 0.360            | 0.061        | 0.004            | 0.966  | 0.023      | 0.043               | 0.623 | 0.036       | 0.096    | 0.208       | 0.222        | 0.140 | 0.137          |
| AK4      | 0.677      | 0.573  | 0.173          | 0.024            | 0.208    | 0.148   | 0.946 | 0.426    | 0.352            | 0.370        | 0.064            | 0.664  | 0.395      | 0.424               | 0.811 | 0.377       | 0.371    | 0.307       | 0.431        | 0.980 | 0.699          |
| ANXA2    | 0.574      | 0.260  | 0.808          | 0.043            | 0.313    | 0.613   | 0.730 | 0.648    | 0.125            | 0.681        | 0.050            | 0.577  | 0.316      | 0.220               | 0.594 | 0.086       | 0.182    | 0.405       | 0.731        | 0.122 | 0.129          |
| APOH     | 0.151      | 0.738  | 0.256          | 0.089            | 0.586    | 0.779   | 0.960 | 0.823    | 0.448            | 0.492        | 0.827            | 0.055  | 0.616      | 0.573               | 0.998 | 0.048       | 0.352    | 0.044       | 0.036        | 0.153 | 0.068          |
| AQP4     | 0.108      | 0.129  | 0.774          | 0.143            | 0.610    | 0.090   | 0.257 | 0.095    | 0.189            | 0.434        | 0.606            | 0.024  | 0.667      | 0.009               | 0.225 | 0.049       | 0.795    | 0.099       | 0.246        | 0.032 | 0.784          |
| C3       | 0.794      | 0.692  | 0.310          | 0.164            | 0.157    | 0.197   | 0.717 | 0.945    | 0.163            | 0.663        | 0.085            | 0.251  | 0.244      | 0.209               | 0.707 | 0.022       | 0.321    | 0.994       | 0.503        | 0.032 | 0.150          |
| CADM3    | 0.805      | 0.579  | 0.679          | 0.307            | 0.317    | 0.606   | 0.878 | 0.013    | 0.644            | 0.581        | 0.246            | 0.547  | 0.103      | 0.778               | 0.636 | 0.755       | 0.546    | 0.980       | 0.109        | 0.021 | 0.021          |
| CHD4     | 0.656      | 0.902  | 0.602          | 0.003            | 0.369    | 0.566   | 0.720 | 0.619    | 0.156            | 0.990        | 0.008            | 0.978  | 0.085      | 0.664               | 0.400 | 0.241       | 0.020    | 0.039       | 0.494        | 0.124 | 0.085          |
| CHGA     | 0.041      | 0.144  | 0.585          | 0.032            | 0.186    | 0.708   | 0.584 | 0.859    | 0.319            | 0.478        | 0.861            | 0.167  | 0.611      | 0.015               | 0.347 | 0.495       | 0.260    | 0.016       | 0.498        | 0.095 | 0.792          |
| CSF2     | 0.120      | 0.598  | 0.716          | 0.034            | 0.018    | 0.495   | 0.852 | 0.340    | 0.453            | 0.053        | 0.033            | 0.304  | 0.104      | 0.143               | 0.451 | 0.108       | 0.208    | 0.197       | 0.182        | 0.500 | 0.314          |
| CTLA4    | 0.453      | 0.571  | 0.613          | 0.250            | 0.517    | 0.483   | 0.612 | 0.451    | 0.536            | 0.955        | 0.018            | 0.351  | 0.073      | 0.132               | 0.680 | 0.013       | 0.160    | 0.783       | 0.598        | 0.012 | 0.108          |
| CTSG     | 0.524      | 0.879  | 0.508          | 0.038            | 0.239    | 0.719   | 0.839 | 0.762    | 0.581            | 0.280        | 0.005            | 0.779  | 0.016      | 0.237               | 0.833 | 0.103       | 0.093    | 0.389       | 0.511        | 0.234 | 0.112          |
| CXCL8    | 0.373      | 0.710  | 0.123          | 0.007            | 0.437    | 0.663   | 0.721 | 0.685    | 0.357            | 0.140        | 0.020            | 0.558  | 0.059      | 0.236               | 0.475 | 0.222       | 0.106    | 0.019       | 0.325        | 0.921 | 0.388          |
| DBT      | 0.871      | 0.240  | 0.594          | 0.627            | 0.311    | 0.234   | 0.510 | 0.179    | 0.992            | 0.090        | 0.259            | 0.422  | 0.021      | 0.238               | 0.093 | 0.173       | 0.601    | 0.240       | 0.515        | 0.163 | 0.734          |
| DLAT     | 0.817      | 0.638  | 0.644          | 0.494            | 0.198    | 0.680   | 0.355 | 0.618    | 0.995            | 0.620        | 0.228            | 0.323  | 0.354      | 0.997               | 0.320 | 0.040       | 0.326    | 0.808       | 0.417        | 0.178 | 0.096          |
| ECE1     | 0.180      | 0.718  | 0.808          | <0.001           | 0.213    | 0.132   | 0.556 | 0.808    | 0.057            | 0.817        | 0.011            | 0.771  | 0.062      | 0.075               | 0.183 | 0.378       | 0.023    | 0.343       | 0.292        | 0.806 | 0.834          |
| EIF4H    | 0.815      | 0.788  | 0.714          | 0.039            | 0.447    | 0.690   | 0.750 | 0.636    | 0.225            | 0.510        | 0.072            | 0.920  | 0.131      | 0.110               | 0.854 | 0.461       | 0.077    | 0.981       | 0.696        | 0.063 | 0.106          |
| ELANE    | 0.615      | 0.518  | 0.330          | 0.372            | 0.693    | 0.380   | 0.993 | 0.691    | 0.592            | 0.331        | 0.029            | 0.607  | 0.064      | 0.418               | 0.353 | 0.031       | 0.184    | 0.893       | 0.858        | 0.185 | 0.046          |
| EXOSC10  | 0.854      | 0.325  | 0.248          | 0.013            | 0.676    | 0.508   | 0.660 | 0.920    | 0.787            | 0.514        | 0.547            | 0.906  | 0.572      | 0.782               | 0.496 | 0.145       | 0.348    | 0.212       | 0.532        | 0.106 | 0.305          |
| GRP      | 0.173      | 0.203  | 0.947          | 0.001            | 0.194    | 0.423   | 0.425 | 0.157    | 0.192            | 0.421        | 0.378            | 0.041  | 0.427      | 0.443               | 0.584 | 0.717       | 0.213    | 0.064       | 0.185        | 0.614 | 0.966          |
| HARS     | 0.854      | 0.577  | 0.427          | 0.053            | 0.301    | 0.138   | 0.787 | 0.782    | 0.341            | 0.543        | 0.047            | 0.292  | 0.269      | 0.269               | 0.631 | 0.047       | 0.210    | 0.496       | 0.907        | 0.007 | 0.047          |
| HIST1H4A | 0.748      | 0.369  | 0.431          | 0.003            | 0.506    | 0.253   | 0.591 | 0.932    | 0.704            | 0.218        | 0.020            | 0.591  | 0.024      | 0.937               | 0.435 | 0.192       | 0.199    | 0.049       | 0.567        | 0.713 | 0.479          |
| ICA1     | 0.986      | 0.899  | 0.117          | 0.009            | 0.510    | 0.283   | 0.947 | 0.409    | 0.648            | 0.453        | 0.143            | 0.311  | 0.954      | 0.132               | 0.926 | 0.276       | 0.210    | 0.178       | 0.677        | 0.898 | 0.122          |
| IFNA4    | 0.845      | 0.899  | 0.303          | 0.150            | 0.298    | 0.161   | 0.978 | 0.896    | 0.246            | 0.552        | 0.011            | 0.364  | 0.032      | 0.581               | 0.548 | 0.014       | 0.081    | 0.901       | 0.346        | 0.023 | 0.107          |
| IFNA6    | 0.399      | 0.597  | 0.403          | 0.045            | 0.432    | 0.213   | 0.641 | 0.853    | 0.440            | 0.162        | 0.010            | 0.994  | 0.008      | 0.214               | 0.883 | 0.035       | 0.103    | 0.312       | 0.147        | 0.666 | 0.591          |
| IGF1R    | 0.881      | 0.739  | 0.544          | 0.394            | 0.108    | 0.454   | 0.955 | 0.918    | 0.479            | 0.407        | 0.053            | 0.247  | 0.245      | 0.357               | 0.593 | 0.014       | 0.499    | 0.664       | 0.440        | 0.107 | 0.201          |
| IL17A    | 0.506      | 0.621  | 0.389          | 0.014            | 0.054    | 0.765   | 0.732 | 0.882    | 0.039            | 0.874        | 0.067            | 0.031  | 0.864      | 0.070               | 0.619 | 0.755       | 0.134    | 0.301       | 0.928        | 0.453 | 0.744          |
| IL4      | 0.488      | 0.793  | 0.835          | 0.115            | 0.066    | 0.798   | 0.966 | 0.279    | 0.123            | 0.351        | 0.016            | 0.900  | 0.072      | 0.304               | 0.550 | 0.470       | 0.015    | 0.776       | 0.607        | 0.477 | 0.248          |
| IL6      | 0.469      | 0.716  | 0.937          | 0.099            | 0.719    | 0.489   | 0.782 | 0.028    | 0.861            | 0.219        | 0.096            | 0.395  | 0.397      | 0.460               | 0.642 | 0.661       | 0.154    | 0.637       | 0.588        | 0.014 | 0.262          |
| INS      | 0.224      | 0.218  | 0.482          | 0.005            | 0.232    | 0.795   | 0.252 | 0.163    | 0.679            | 0.399        | 0.323            | 0.792  | 0.250      | 0.929               | 0.742 | 0.918       | 0.251    | 0.620       | 0.040        | 0.001 | 0.072          |
| LYZ      | 0.707      | 0.843  | 0.360          | 0.058            | 0.205    | 0.331   | 0.951 | 0.776    | 0.422            | 0.192        | 0.001            | 0.833  | 0.006      | 0.120               | 0.970 | 0.033       | 0.032    | 0.524       | 0.206        | 0.172 | 0.128          |
| MDA5     | 0.444      | 0.983  | 0.771          | <0.001           | 0.309    | 0.741   | 0.447 | 0.782    | 0.252            | 0.933        | 0.015            | 0.143  | 0.095      | 0.350               | 0.379 | 0.186       | 0.096    | 0.005       | 0.697        | 0.044 | 0.038          |
| MIF      | 0.969      | 0.478  | 0.640          | 0.003            | 0.703    | 0.344   | 0.977 | 0.656    | 0.489            | 0.369        | 0.065            | 0.229  | 0.073      | 0.347               | 0.900 | 0.329       | 0.070    | 0.008       | 0.383        | 0.006 | 0.001          |
| MOV10    | 0.613      | 0.859  | 0.073          | 0.058            | 0.019    | 0.306   | 0.397 | 0.918    | 0.040            | 0.208        | 0.015            | 0.161  | 0.200      | 0.216               | 0.249 | 0.333       | 0.079    | 0.047       | 0.330        | 0.113 | 0.039          |
| MX1      | 0.788      | 0.993  | 0.245          | 0.003            | 0.712    | 0.763   | 0.902 | 0.099    | 0.973            | 0.987        | 0.027            | 0.910  | 0.061      | 0.306               | 0.428 | 0.148       | 0.119    | 0.461       | 0.391        | 0.016 | 0.020          |
| NCL      | 0.856      | 0.437  | 0.190          | 0.004            | 0.292    | 0.174   | 0.439 | 0.853    | 0.104            | 0.320        | 0.020            | 0.266  | 0.421      | 0.059               | 0.377 | 0.265       | 0.279    | 0.026       | 0.805        | 0.126 | 0.015          |
| NPM1     | 0.661      | 0.363  | 0.874          | 0.026            | 0.723    | 0.346   | 0.457 | 0.399    | 0.548            | 0.632        | 0.128            | 0.493  | 0.122      | 0.581               | 0.719 | 0.036       | 0.197    | 0.928       | 0.940        | 0.007 | 0.073          |
| PRTN3    | 0.742      | 0.557  | 0.666          | 0.164            | 0.917    | 0.770   | 0.796 | 0.101    | 0.838            | 0.409        | 0.013            | 0.738  | 0.046      | 0.284               | 0.914 | 0.606       | 0.014    | 0.697       | 0.594        | 0.246 | 0.292          |
| RAE1     | 0.466      | 0.025  | 0.043          | 0.507            | 0.169    | 0.220   | 0.325 | 0.488    | 0.180            | 0.450        | 0.101            | 0.290  | 0.094      | 0.798               | 0.658 | 0.500       | 0.151    | 0.690       | 0.197        | 0.206 | 0.230          |
| RNF41    | 0.956      | 0.803  | 0.736          | 0.035            | 0.640    | 0.992   | 0.965 | 0.405    | 0.478            | 0.892        | 0.025            | 0.809  | 0.034      | 0.217               | 0.353 | 0.043       | 0.085    | 0.669       | 0.450        | 0.012 | 0.024          |
| RPLP2    | 0.952      | 0.874  | 0.484          | 0.146            | 0.323    | 0.408   | 0.894 | 0.533    | 0.217            | 0.484        | 0.036            | 0.886  | 0.068      | 0.128               | 0.894 | 0.045       | 0.091    | 0.796       | 0.900        | 0.160 | 0.139          |
| S100A9   | 0.448      | 0.813  | 0.065          | 0.241            | 0.255    | 0.560   | 0.923 | 0.416    | 0.231            | 0.984        | 0.034            | 0.508  | 0.037      | 0.298               | 0.567 | 0.027       | 0.081    | 0.696       | 0.847        | 0.009 | 0.093          |
| SET      | 0.899      | 0.589  | 0.261          | 0.226            | 0.838    | 0.472   | 0.155 | 0.205    | 0.524            | 0.428        | 0.197            | 0.356  | 0.102      | 0.545               | 0.516 | 0.018       | 0.214    | 0.445       | 1.000        | 0.006 | 0.208          |
| SLC30A8  | 0.169      | 0.880  | 0.298          | 0.569            | 0.950    | 0.111   | 0.573 | 0.659    | 0.664            | 0.158        | 0.005            | 0.270  | 0.020      | 0.089               | 0.637 | 0.154       | 0.012    | 0.954       | 0.831        | 0.176 | 0.117          |
| SNRNP70  | 0.281      | 0.746  | 0.638          | 0.007            | 0.090    | 0.837   | 0.663 | 0.874    | 0.213            | 0.486        | 0.192            | 0.990  | 0.144      | 0.113               | 0.497 | 0.071       | 0.266    | 0.426       | 0.697        | 0.611 | 0.258          |
| SNRPA    | 0.103      | 0.932  | 0.640          | 0.024            | 0.699    | 0.170   | 0.893 | 0.680    | 0.473            | 0.804        | 0.544            | 0.534  | 0.174      | 0.526               | 0.943 | 0.724       | 0.611    | 0.680       | 0.613        | 0.508 | 0.404          |
| SNRPB    | 0.005      | 0.028  | 0.353          | <0.001           | 0.498    | 0.198   | 0.833 | 0.133    | 0.033            | 0.051        | 0.093            | 0.043  | 0.038      | 0.060               | 0.135 | 0.023       | 0.085    | 0.002       | 0.383        | 0.877 | 0.110          |
| SNRPD1   | 0.536      | 0.945  | 0.462          | 0.523            | 0.319    | 0.940   | 0.047 | 0.755    | 0.848            | 0.201        | 0.519            | 0.886  | 0.140      | 0.420               | 0.669 | 0.648       | 0.225    | 0.043       | 0.078        | 0.066 | 0.022          |
| SOX13    | 0.399      | 0.670  | 0.443          | 0.616            | 0.040    | 0.797   | 0.669 | 0.826    | 0.483            | 0.603        | 0.002            | 0.456  | 0.089      | 0.881               | 0.484 | 0.539       | 0.001    | 0.283       | 0.888        | 0.540 | 0.020          |
| SRP19    | 0.433      | 0.370  | 0.086          | 0.012            | 0.187    | 0.047   | 0.992 | 0.280    | 0.110            | 0.075        | 0.023            | 0.478  | 0.059      | 0.164               | 0.746 | 0.228       | 0.160    | 0.202       | 0.720        | 0.270 | 0.033          |
| SSB      | 0.415      | 0.978  | 0.897          | 0.093            | 0.547    | 0.851   | 0.129 | 0.967    | 0.961            | 0.686        | 0.860            | 0.722  | 0.635      | 0.968               | 0.573 | 0.687       | 0.207    | 0.016       | 0.852        | 0.098 | 0.027          |
| TG       | 0.747      | 0.625  | 0.267          | 0.313            | 0.229    | 0.172   | 0.985 | 0.675    | 0.216            | 0.777        | 0.168            | 0.181  | 0.417      | 0.376               | 0.715 | 0.036       | 0.585    | 0.688       | 0.607        | 0.006 | 0.127          |
| TGFB1    | 0.381      | 0.181  | 0.730          | 0.132            | 0.751    | 0.400   | 0.131 | 0.307    | 0.633            | 0.398        | 0.876            | 0.867  | 0.720      | 0.356               | 0.045 | 0.541       | 0.483    | 0.733       | 0.051        | 0.008 | 0.056          |
| TOP1     | 0.980      | 0.134  | 0.132          | 0.007            | 0.974    | 0.086   | 0.958 | 0.925    | 0.636            | 0.095        | 0.238            | 0.651  | 0.505      | 0.433               | 0.372 | 0.295       | 0.484    | 0.001       | 0.815        | 0.029 | 0.001          |
| TRIM2    |            |        |                |                  |          |         |       |          |                  |              |                  |        |            |                     |       |             |          |             |              |       |                |



**Table S6.** Associations of autoantibody reactivity with symptoms in women. Beta coefficients from age-adjusted regression analysis comparing males with a specific symptom burden to females without the same symptom are shown. The last 3 columns display results from age-adjusted analyses comparing females with different levels of symptoms burden to the pre-pandemic healthy control group.

| Beta     | Chest pain | Chills | Conjunctivitis | Cough dry | Fever  | Loss of appetite | Nasal congestion | Nausea | Shortness of breath | Skin   | Smell taste | Sore throat | Vomiting | Asymptomatic | Mild   | More than mild |
|----------|------------|--------|----------------|-----------|--------|------------------|------------------|--------|---------------------|--------|-------------|-------------|----------|--------------|--------|----------------|
| AQP4     | -0.093     | 0.029  | -0.029         | -0.150    | 0.130  | -0.174           | -0.251           | -0.262 | -0.022              | -0.252 | -0.201      | -0.465      | 0.207    | 0.479        | 0.499  | -0.121         |
| C3       | -0.388     | -0.248 | -0.372         | -0.130    | 0.091  | -0.158           | -0.138           | -0.048 | -0.064              | 0.162  | 0.177       | -0.173      | 0.470    | 0.429        | 0.492  | 0.274          |
| CENPB    | -0.065     | -0.169 | -0.328         | -0.239    | 0.036  | -0.141           | -0.046           | 0.069  | 0.161               | 0.004  | 0.204       | -0.043      | 0.700    | 0.369        | 0.357  | 0.443          |
| CHD3     | -0.385     | -0.438 | 0.019          | -0.102    | -0.260 | -0.117           | -0.266           | -0.021 | -0.007              | 0.796  | 0.124       | -0.305      | 0.200    | 1.041        | 1.062  | 0.485          |
| CHD4     | 0.054      | -0.404 | -0.691         | -0.203    | -0.116 | -0.280           | 0.120            | 0.028  | 0.244               | 0.153  | 0.180       | -0.156      | -0.007   | 0.111        | 0.051  | 0.298          |
| CHGA     | 0.052      | -0.149 | 0.015          | -0.003    | 0.096  | -0.118           | -0.349           | -0.014 | 0.525               | -0.471 | -0.046      | -0.187      | 0.062    | 0.215        | 0.007  | 0.068          |
| DBT      | -0.333     | -0.448 | -0.426         | -0.400    | -0.439 | 0.081            | 0.096            | -0.038 | 0.001               | 0.033  | 0.032       | 0.055       | -0.100   | 0.740        | 0.765  | 0.479          |
| ECE1     | 0.069      | -0.178 | -0.044         | -0.285    | 0.055  | -0.252           | 0.082            | 0.054  | 0.240               | -0.288 | 0.345       | -0.125      | 0.737    | 0.689        | 0.478  | 0.313          |
| ELANE    | 0.351      | -0.113 | 1.044          | -0.245    | -0.166 | -0.502           | -0.094           | 0.140  | 0.167               | -0.065 | -0.104      | -0.066      | 0.105    | 0.548        | 0.305  | 0.332          |
| EXOSC10  | -0.029     | -0.222 | -0.464         | -0.429    | -0.187 | -0.471           | -0.240           | -0.031 | 0.108               | 0.078  | -0.115      | -0.150      | 0.195    | 0.992        | 0.372  | 0.396          |
| GAD65    | -0.246     | -0.193 | -0.248         | -0.275    | -0.098 | -0.415           | 0.011            | -0.157 | 0.090               | -0.320 | 0.129       | -0.162      | -0.059   | 0.185        | 0.211  | -0.113         |
| HARS     | -0.108     | -0.215 | 0.042          | -0.197    | 0.116  | -0.059           | -0.175           | 0.085  | 0.025               | -0.313 | 0.223       | -0.178      | 0.697    | 0.380        | 0.416  | 0.338          |
| HIST1H4A | -0.071     | -0.129 | -0.315         | -0.399    | -0.088 | -0.267           | -0.109           | -0.019 | 0.257               | 0.083  | 0.052       | -0.107      | 0.326    | 0.419        | 0.540  | 0.399          |
| IFNA2    | -0.404     | -0.199 | -0.556         | -0.191    | 0.193  | -0.103           | -0.238           | -0.046 | 0.058               | -0.127 | -0.156      | 0.138       | 0.632    | 0.421        | 0.376  | 0.042          |
| IGF1R    | -0.437     | -0.124 | -0.558         | -0.097    | 0.031  | -0.185           | -0.218           | -0.102 | -0.207              | -0.179 | -0.120      | -0.170      | 0.445    | 0.471        | 0.629  | 0.303          |
| IL10     | -0.230     | -0.330 | -0.160         | -0.366    | -0.155 | -0.248           | -0.124           | -0.011 | 0.000               | 0.050  | 0.001       | -0.217      | 0.247    | 0.760        | 0.277  | 0.293          |
| INS      | 0.310      | -0.112 | 1.450          | 0.012     | -0.211 | -0.251           | -0.079           | -0.002 | -0.172              | -0.454 | 0.048       | -0.062      | 0.238    | 0.442        | 0.510  | 0.428          |
| MOV10    | -0.150     | 0.022  | 1.161          | -0.025    | 0.000  | -0.024           | -0.159           | -0.128 | -0.208              | 0.249  | 0.149       | 0.069       | 0.087    | -0.195       | -0.063 | -0.161         |
| MX1      | 0.076      | -0.243 | -0.525         | -0.253    | -0.227 | -0.500           | -0.139           | -0.040 | 0.262               | 0.079  | 0.113       | -0.104      | 0.183    | 0.741        | 0.524  | 0.468          |
| PRTN3    | 0.273      | -0.201 | 0.105          | -0.144    | 0.000  | -0.475           | 0.181            | -0.227 | 0.285               | 0.987  | -0.233      | -0.340      | -0.158   | 0.384        | 0.574  | 0.277          |
| PTPRN    | 0.227      | 0.072  | -0.083         | -0.036    | 0.357  | 0.024            | 0.170            | 0.034  | 0.299               | -0.221 | 0.311       | 0.053       | 0.086    | -0.288       | 0.040  | 0.151          |
| RNF41    | -0.140     | -0.129 | -0.544         | -0.233    | 0.031  | -0.423           | -0.091           | -0.096 | 0.091               | -0.250 | 0.121       | -0.134      | 0.296    | 0.677        | 0.295  | 0.486          |
| ROS1     | -0.094     | -0.051 | -0.314         | -0.214    | -0.067 | -0.371           | -0.394           | -0.124 | -0.144              | -0.318 | -0.380      | -0.262      | 0.172    | 0.395        | 0.203  | 0.036          |
| RPLP2    | -0.234     | -0.243 | -0.269         | -0.264    | 0.048  | -0.160           | -0.249           | -0.044 | 0.047               | -0.221 | 0.060       | -0.053      | 0.624    | 0.292        | 0.447  | 0.025          |
| S100A8   | -0.161     | 0.219  | 0.547          | -0.077    | 0.383  | 0.189            | -0.129           | -0.176 | 0.142               | -0.480 | 0.063       | -0.028      | 0.289    | 0.504        | 0.178  | 0.472          |
| S100A9   | -0.355     | -0.353 | -0.214         | -0.335    | -0.149 | -0.373           | -0.286           | -0.088 | -0.004              | -0.236 | 0.060       | -0.298      | 0.309    | 1.036        | 0.544  | 0.356          |
| SET      | -0.046     | -0.248 | -0.482         | -0.327    | -0.121 | -0.527           | -0.043           | -0.232 | -0.029              | 0.224  | -0.254      | -0.214      | 0.424    | 0.553        | 0.303  | 0.038          |
| SMD3     | 0.041      | -0.288 | -0.175         | -0.417    | -0.301 | -0.269           | -0.004           | 0.027  | 0.096               | 0.152  | 0.270       | -0.005      | 0.259    | 0.325        | 0.316  | 0.287          |
| SNRPC    | 0.124      | -0.130 | 0.071          | -0.075    | 0.148  | -0.021           | -0.049           | 0.393  | -0.207              | -0.196 | -0.022      | 0.237       | 0.306    | 0.136        | 0.185  | 0.465          |
| SOX13    | 0.088      | -0.299 | -0.182         | -0.155    | -0.018 | -0.028           | 0.219            | 0.039  | 0.269               | -0.701 | -0.179      | -0.034      | -0.475   | 0.701        | 1.094  | 0.693          |
| SP100    | 0.140      | 0.080  | -0.023         | -0.015    | 0.249  | -0.102           | -0.040           | 0.016  | 0.530               | -0.203 | -0.063      | 0.208       | 0.706    | 0.402        | 0.172  | 0.759          |
| SRP54    | -0.485     | -0.188 | 0.225          | -0.084    | -0.076 | 0.120            | -0.119           | -0.140 | -0.130              | 0.004  | -0.005      | 0.011       | -0.322   | 0.219        | 0.539  | 0.185          |
| TG       | -0.449     | -0.256 | -0.405         | -0.144    | 0.104  | -0.131           | -0.251           | 0.015  | -0.117              | -0.182 | 0.151       | -0.174      | 0.527    | 0.506        | 0.479  | 0.268          |
| TGFB1    | 0.258      | -0.142 | -0.090         | -0.298    | -0.286 | -0.250           | -0.068           | 0.005  | 0.191               | 0.072  | 0.079       | -0.382      | 0.190    | -0.077       | -0.218 | -0.118         |
| TOP1     | -0.088     | -0.200 | -0.297         | -0.476    | -0.183 | -0.390           | -0.046           | -0.001 | 0.111               | 0.094  | 0.179       | -0.201      | 0.302    | 0.462        | 0.421  | 0.344          |
| TPO      | -0.410     | -0.098 | -0.621         | -0.043    | 0.174  | -0.063           | -0.004           | -0.434 | 0.072               | 0.148  | 0.036       | -0.506      | 0.128    | 0.553        | 0.608  | 0.159          |
| TRIM33   | 0.024      | -0.233 | 0.267          | -0.315    | -0.104 | -0.177           | -0.018           | 0.098  | 0.100               | 0.201  | 0.004       | -0.119      | -0.086   | -0.004       | -0.025 | -0.194         |
| UBTF     | -0.031     | -0.221 | -0.209         | -0.503    | -0.209 | -0.228           | -0.141           | 0.016  | 0.090               | 0.160  | 0.283       | -0.211      | 0.281    | 0.580        | 0.394  | 0.126          |

**Table S7.** Associations of AABs reactivity with symptoms in women. P values from age-adjusted regression analysis comparing males with a specific symptom burden to females without the same symptom are shown. The last 3 columns display results from age-adjusted analyses comparing females with different levels of symptoms burden to the pre-pandemic healthy control group.

| P value  | Chest pain | Chills | Conjunctivitis | Cough dry | Fever | Loss of appetite | Nasal congestion | Nausea | Shortness of breath | Skin  | Smell taste | Sore throat | Vomiting | Asymptomatic | Mild  | More than mild |
|----------|------------|--------|----------------|-----------|-------|------------------|------------------|--------|---------------------|-------|-------------|-------------|----------|--------------|-------|----------------|
| AQP4     | 0.690      | 0.879  | 0.951          | 0.429     | 0.502 | 0.363            | 0.183            | 0.193  | 0.918               | 0.473 | 0.289       | 0.014       | 0.556    | 0.260        | 0.154 | 0.668          |
| C3       | 0.047      | 0.121  | 0.346          | 0.418     | 0.578 | 0.327            | 0.385            | 0.776  | 0.714               | 0.585 | 0.268       | 0.285       | 0.111    | 0.059        | 0.075 | 0.222          |
| CENPB    | 0.773      | 0.353  | 0.466          | 0.189     | 0.845 | 0.444            | 0.800            | 0.721  | 0.421               | 0.991 | 0.260       | 0.814       | 0.036    | 0.132        | 0.200 | 0.096          |
| CHD3     | 0.106      | 0.023  | 0.968          | 0.600     | 0.190 | 0.553            | 0.170            | 0.921  | 0.975               | 0.026 | 0.525       | 0.118       | 0.580    | 0.003        | 0.003 | 0.110          |
| CHD4     | 0.822      | 0.038  | 0.152          | 0.299     | 0.562 | 0.156            | 0.539            | 0.893  | 0.256               | 0.675 | 0.357       | 0.430       | 0.984    | 0.751        | 0.882 | 0.340          |
| CHGA     | 0.822      | 0.434  | 0.974          | 0.989     | 0.619 | 0.540            | 0.064            | 0.944  | 0.011               | 0.179 | 0.810       | 0.329       | 0.859    | 0.651        | 0.984 | 0.810          |
| DBT      | 0.134      | 0.012  | 0.340          | 0.026     | 0.016 | 0.660            | 0.594            | 0.844  | 0.996               | 0.922 | 0.859       | 0.762       | 0.765    | 0.075        | 0.012 | 0.113          |
| ECE1     | 0.739      | 0.294  | 0.916          | 0.090     | 0.750 | 0.139            | 0.629            | 0.763  | 0.196               | 0.358 | 0.039       | 0.466       | 0.017    | 0.016        | 0.111 | 0.184          |
| ELANE    | 0.141      | 0.563  | 0.028          | 0.207     | 0.402 | 0.010            | 0.627            | 0.500  | 0.435               | 0.856 | 0.592       | 0.735       | 0.770    | 0.044        | 0.352 | 0.191          |
| EXOSC10  | 0.906      | 0.266  | 0.347          | 0.030     | 0.359 | 0.018            | 0.227            | 0.883  | 0.624               | 0.834 | 0.563       | 0.458       | 0.598    | 0.002        | 0.255 | 0.184          |
| GAD65    | 0.249      | 0.267  | 0.563          | 0.111     | 0.579 | 0.017            | 0.948            | 0.395  | 0.638               | 0.320 | 0.456       | 0.354       | 0.855    | 0.632        | 0.491 | 0.614          |
| HARS     | 0.637      | 0.247  | 0.926          | 0.290     | 0.539 | 0.756            | 0.346            | 0.668  | 0.902               | 0.363 | 0.229       | 0.342       | 0.041    | 0.165        | 0.162 | 0.230          |
| HIST1H4A | 0.779      | 0.526  | 0.531          | 0.049     | 0.672 | 0.193            | 0.592            | 0.931  | 0.249               | 0.827 | 0.797       | 0.604       | 0.387    | 0.176        | 0.088 | 0.165          |
| IFNA2    | 0.052      | 0.243  | 0.185          | 0.262     | 0.265 | 0.551            | 0.160            | 0.799  | 0.756               | 0.688 | 0.358       | 0.422       | 0.043    | 0.099        | 0.191 | 0.862          |
| IGF1R    | 0.038      | 0.472  | 0.189          | 0.573     | 0.860 | 0.287            | 0.203            | 0.579  | 0.273               | 0.575 | 0.485       | 0.327       | 0.161    | 0.139        | 0.052 | 0.239          |
| IL10     | 0.295      | 0.063  | 0.716          | 0.039     | 0.396 | 0.169            | 0.487            | 0.955  | 1.000               | 0.879 | 0.995       | 0.227       | 0.455    | 0.022        | 0.397 | 0.288          |
| INS      | 0.221      | 0.587  | 0.004          | 0.954     | 0.315 | 0.228            | 0.702            | 0.993  | 0.449               | 0.234 | 0.817       | 0.765       | 0.533    | 0.179        | 0.155 | 0.123          |
| MOV10    | 0.446      | 0.890  | 0.003          | 0.878     | 0.999 | 0.883            | 0.317            | 0.452  | 0.234               | 0.398 | 0.350       | 0.666       | 0.769    | 0.585        | 0.840 | 0.531          |
| MX1      | 0.750      | 0.207  | 0.270          | 0.188     | 0.247 | 0.009            | 0.469            | 0.847  | 0.215               | 0.826 | 0.558       | 0.595       | 0.608    | 0.012        | 0.103 | 0.069          |
| PRTN3    | 0.271      | 0.319  | 0.833          | 0.476     | 0.998 | 0.019            | 0.369            | 0.289  | 0.197               | 0.007 | 0.247       | 0.094       | 0.673    | 0.344        | 0.151 | 0.366          |
| PTPRN    | 0.298      | 0.684  | 0.850          | 0.837     | 0.046 | 0.893            | 0.334            | 0.857  | 0.123               | 0.501 | 0.076       | 0.769       | 0.793    | 0.427        | 0.906 | 0.615          |
| RNF41    | 0.569      | 0.518  | 0.270          | 0.243     | 0.878 | 0.035            | 0.650            | 0.651  | 0.680               | 0.499 | 0.544       | 0.508       | 0.424    | 0.034        | 0.356 | 0.069          |
| ROS1     | 0.651      | 0.764  | 0.449          | 0.202     | 0.698 | 0.027            | 0.017            | 0.488  | 0.434               | 0.306 | 0.022       | 0.121       | 0.581    | 0.261        | 0.507 | 0.894          |
| RPLP2    | 0.235      | 0.128  | 0.497          | 0.098     | 0.768 | 0.323            | 0.118            | 0.798  | 0.789               | 0.456 | 0.710       | 0.746       | 0.034    | 0.461        | 0.184 | 0.926          |
| S100A8   | 0.475      | 0.232  | 0.226          | 0.677     | 0.039 | 0.309            | 0.483            | 0.368  | 0.482               | 0.157 | 0.731       | 0.881       | 0.395    | 0.226        | 0.579 | 0.116          |
| S100A9   | 0.115      | 0.054  | 0.638          | 0.067     | 0.426 | 0.043            | 0.117            | 0.655  | 0.984               | 0.488 | 0.745       | 0.107       | 0.363    | 0.001        | 0.072 | 0.174          |
| SET      | 0.839      | 0.177  | 0.289          | 0.073     | 0.518 | 0.004            | 0.813            | 0.236  | 0.885               | 0.511 | 0.165       | 0.248       | 0.212    | 0.178        | 0.378 | 0.896          |
| SMD3     | 0.861      | 0.131  | 0.712          | 0.028     | 0.121 | 0.163            | 0.984            | 0.894  | 0.646               | 0.668 | 0.155       | 0.979       | 0.465    | 0.239        | 0.312 | 0.277          |
| SNRPC    | 0.570      | 0.464  | 0.872          | 0.674     | 0.415 | 0.907            | 0.784            | 0.036  | 0.289               | 0.551 | 0.902       | 0.185       | 0.352    | 0.689        | 0.540 | 0.095          |
| SOX13    | 0.693      | 0.098  | 0.685          | 0.392     | 0.923 | 0.879            | 0.224            | 0.840  | 0.175               | 0.035 | 0.321       | 0.851       | 0.155    | 0.072        | 0.001 | 0.014          |
| SP100    | 0.572      | 0.692  | 0.964          | 0.943     | 0.226 | 0.618            | 0.843            | 0.939  | 0.016               | 0.586 | 0.756       | 0.307       | 0.057    | 0.103        | 0.532 | 0.016          |
| SRP54    | 0.018      | 0.263  | 0.589          | 0.620     | 0.660 | 0.481            | 0.480            | 0.434  | 0.484               | 0.990 | 0.975       | 0.950       | 0.302    | 0.611        | 0.138 | 0.517          |
| TG       | 0.031      | 0.131  | 0.336          | 0.398     | 0.550 | 0.446            | 0.138            | 0.936  | 0.531               | 0.564 | 0.375       | 0.312       | 0.093    | 0.040        | 0.097 | 0.274          |
| TGFB1    | 0.231      | 0.419  | 0.835          | 0.088     | 0.107 | 0.156            | 0.698            | 0.979  | 0.320               | 0.825 | 0.651       | 0.029       | 0.559    | 0.849        | 0.574 | 0.689          |
| TOP1     | 0.726      | 0.326  | 0.555          | 0.018     | 0.379 | 0.056            | 0.823            | 0.998  | 0.620               | 0.803 | 0.380       | 0.329       | 0.423    | 0.150        | 0.221 | 0.247          |
| TPO      | 0.081      | 0.612  | 0.190          | 0.822     | 0.375 | 0.747            | 0.984            | 0.032  | 0.732               | 0.677 | 0.850       | 0.008       | 0.720    | 0.107        | 0.082 | 0.579          |
| TRIM33   | 0.902      | 0.144  | 0.499          | 0.047     | 0.525 | 0.273            | 0.912            | 0.564  | 0.568               | 0.497 | 0.979       | 0.462       | 0.771    | 0.993        | 0.942 | 0.487          |
| UBTF     | 0.908      | 0.303  | 0.692          | 0.018     | 0.337 | 0.292            | 0.509            | 0.944  | 0.703               | 0.686 | 0.185       | 0.328       | 0.478    | 0.057        | 0.295 | 0.654          |

**Figure S1. Sex-specific co-occurrence of symptoms.** Sex differences in the occurrence of symptoms are visualized using co-occurrence networks, wherein each symptom is denoted with a node and each edge connecting 2 nodes represents the co-occurrences of 2 symptoms that are significantly higher or lower than would be expected by chance using a probabilistic model. Darker solid lines denote co-occurrences with higher frequency.

**A. Co-Occurrence of Symptoms in Men**

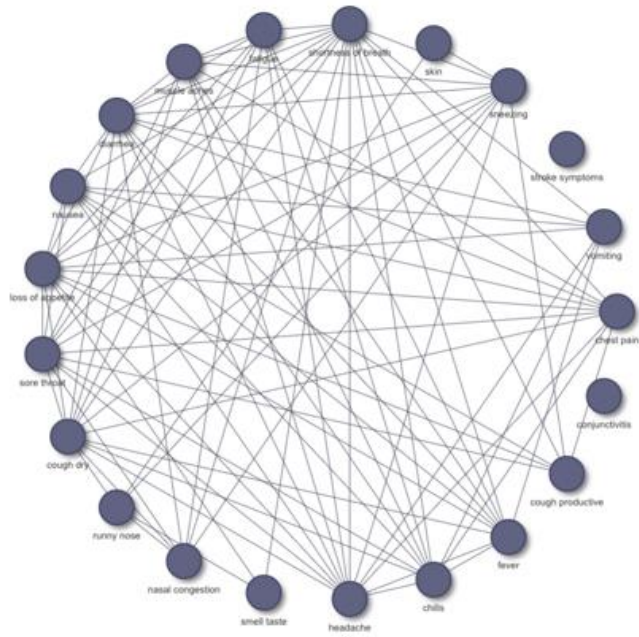

**B. Co-Occurrence of Symptoms in Women**

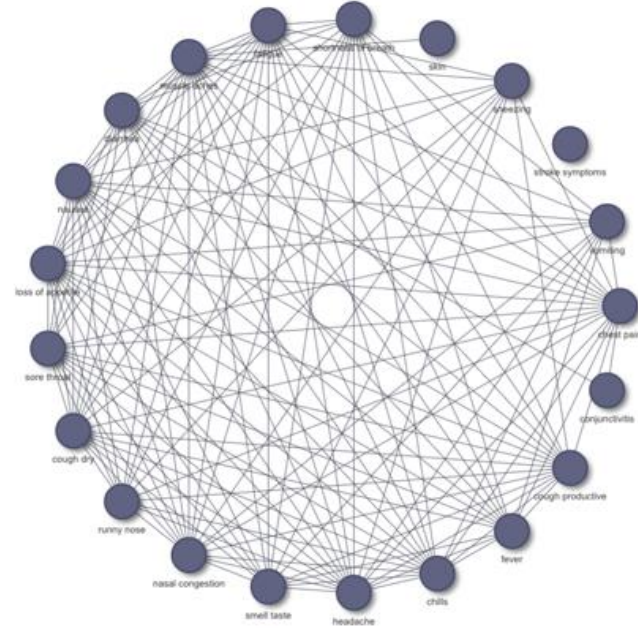



**Figure S3. Sex-specific clustering of autoantibody responses by symptom burden.** K-means clusters of each autoantibody response adjusted by symptoms burden were derived and plotted in distinct colors (per cluster) along x-axis, the principal component 1 (PC1) and y-axis values of the PC2 of male (A, C, E) and female (B, D, F) HCWs.

**A. Men: Asymptomatic Course**

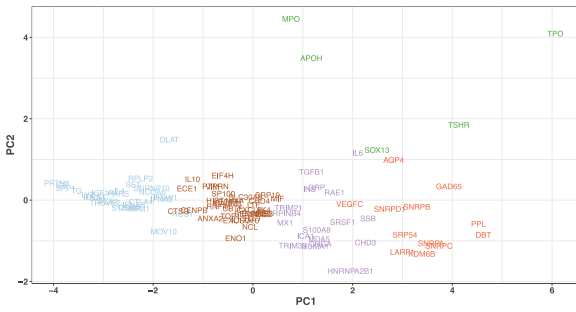

**B. Women: Asymptomatic Course**

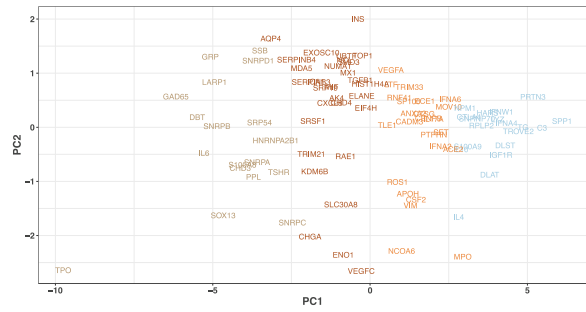

**C. Men: After Mild Symptoms**

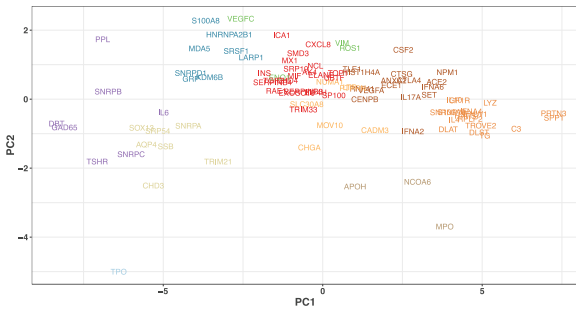

**D. Women: After Mild Symptoms**

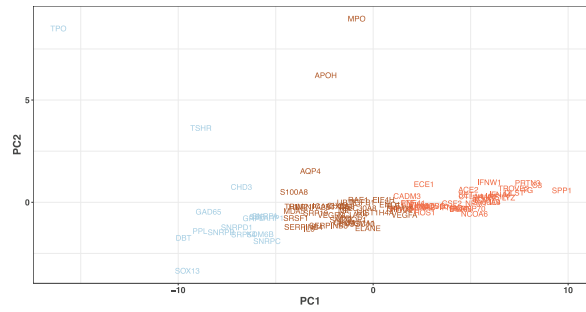

**E. Men: After More than Mild Symptoms**

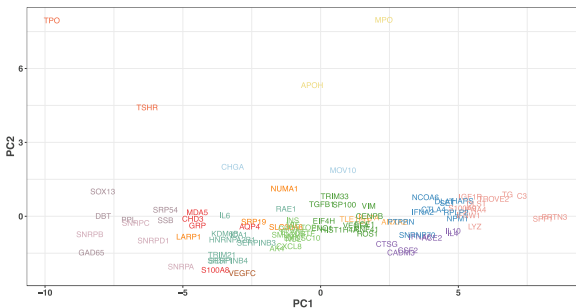

**F. Women: After More than Mild Symptoms**

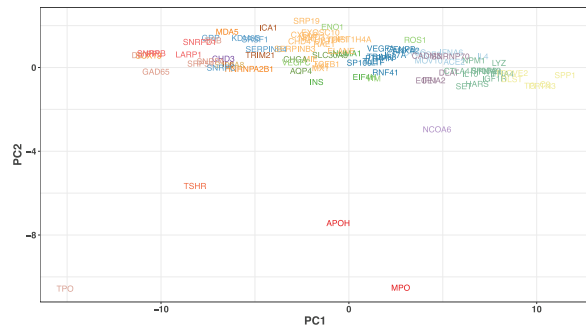

**Figure S4. Sex-specific associations of autoantibody reactivity with timing of symptoms, in persons previously infected by SARS-CoV-2.** From age-adjusted regression analyses, beta coefficients and negative log p values were obtained from examining the associations of symptoms timing with distinct autoantibodies. A higher symptoms timing score denotes more recent timing, with associations for men in **Panel A** and associations for women in **Panel B**.

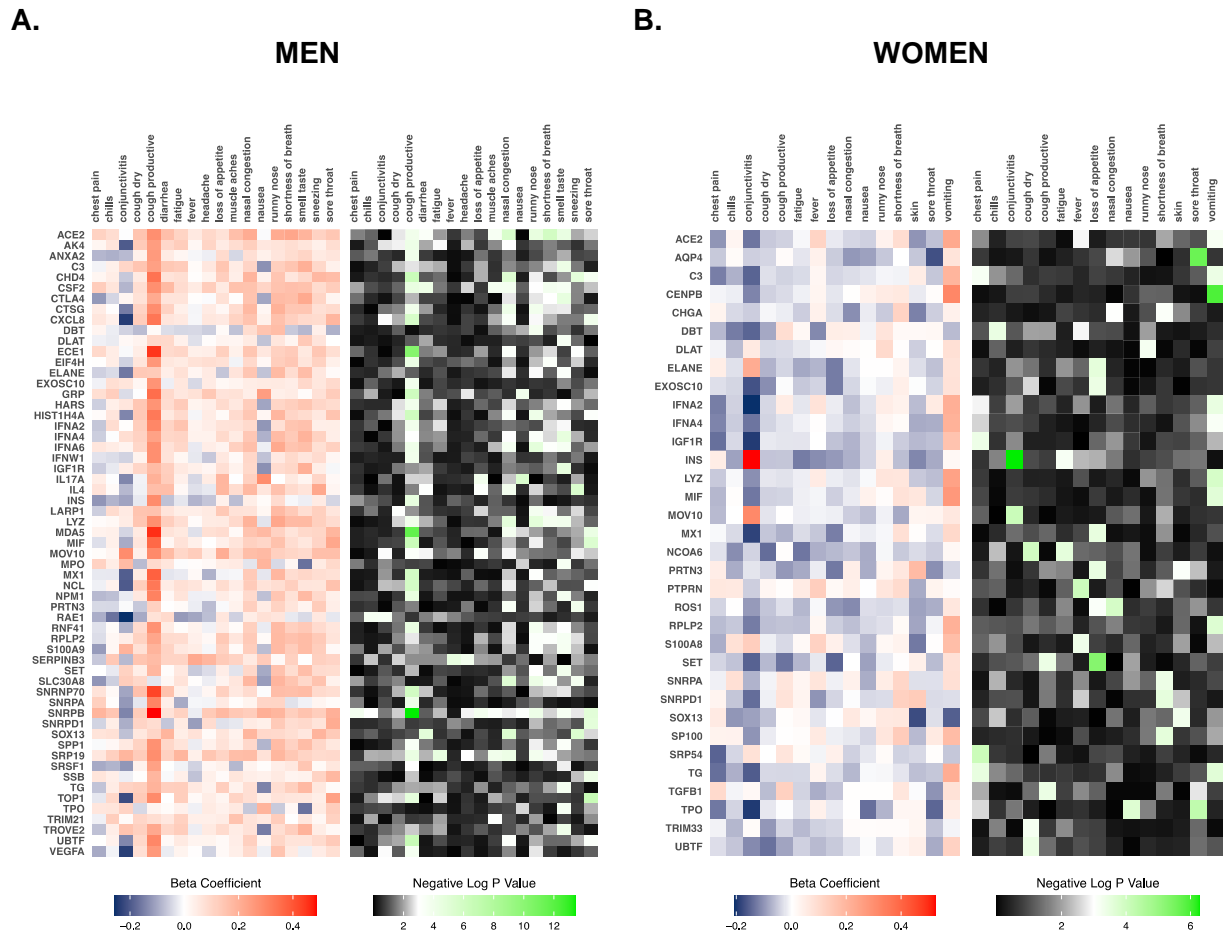

**Figure S5. Sex-specific associations of autoantibodies with SLE status.** In age-adjusted regression analyses, the breadth and magnitude of associations observed AABs reactivity and systemic lupus erythematosus (SLE) compared to health control status were predominantly seen in women compared to men. Beta coefficients were shown to the left, and negative log P values were shown to the right in each panel.

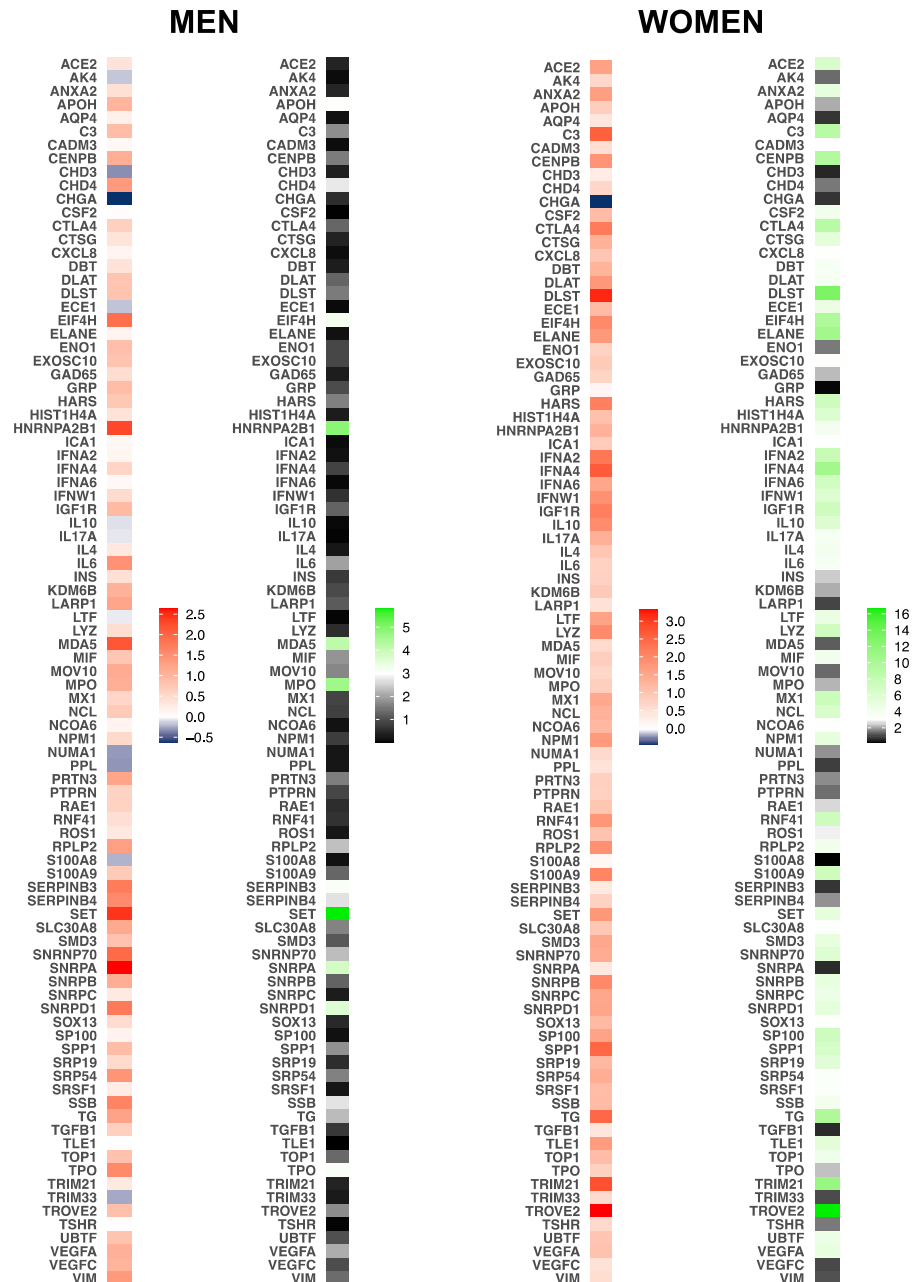

Supplement: MOESM1 [file 19978306]
